# Supplementary material for: Ethnicity and socioeconomic status are related to dietary patterns at age 5 in the Amsterdam born children and their development (ABCD) cohort
Source: PubMed Central journal article supplement (PMC5759294; doi:10.1186/s12889-017-5014-0), 2018-01-08
Supplement: 12889_2017_5014_MOESM1_ESM.pdf [file 12889_2017_5014_MOESM1_ESM.pdf]

Additional file 1. Food groups and their products, used in the PCA analysis in the ABCD cohort (n=2 769).

| <b>Food group</b>                         | <b>Products assigned to the food group</b>                                                                                                                            |
|-------------------------------------------|-----------------------------------------------------------------------------------------------------------------------------------------------------------------------|
| <b>Fruits</b>                             | All sorts of fruits                                                                                                                                                   |
| <b>Vegetables</b>                         | All sorts or raw and boiled vegetables (excluding vegetables in the mashed potato stew)                                                                               |
| <b>Refined breakfast products</b>         | White/refined bread, rusks, crackers, crispbreads, Cornflakes, Cruesli, Rice Krispies, Frosties, Smacks, Honey Loops                                                  |
| <b>Whole grain breakfast products</b>     | Brown- and whole grain bread, rusks, crackers, crispbreads and rye bread, muesli                                                                                      |
| <b>Low-fat spreads</b>                    | Low-fat margarine, Blue Band Good Start                                                                                                                               |
| <b>Full-fat spreads</b>                   | Butter, margarine                                                                                                                                                     |
| <b>Low-fat cheese</b>                     | Low-fat or light cheese (spreads) 20+ 30+                                                                                                                             |
| <b>Full-fat cheese</b>                    | Full-cream cheese (spreads) 48+, Brie 60+, goat cheese, including cheese added to hot meals                                                                           |
| <b>Processed meats</b>                    | Ham, corned beef, liver products, salami, meatloaf, smoked dried beef                                                                                                 |
| <b>Peanut butter</b>                      | Peanut butter                                                                                                                                                         |
| <b>Sandwich toppings (sweet)</b>          | Chocolate spreads and sprinkles, jam, apple syrup, honey, fruit sprinkles, coconut slices, Schuddebuikjes                                                             |
| <b>Low-fat dairy</b>                      | Skimmed, low-fat or artificially sweetened vanilla, fruit or natural quark/yoghurt(drink)/Biogarde/(chocolate) milk, buttermilk                                       |
| <b>Medium-fat dairy</b>                   | Semi-skimmed vanilla, fruit or natural quark/yoghurt(drink)/Biogarde/(chocolate) milk, Barley gruel                                                                   |
| <b>Full-fat dairy</b>                     | Custard, milk pudding, Danootje, full-cream vanilla, fruit or natural quark/yoghurt(drink)/Biogarde/(chocolate) milk, ready-made porridge from oats, semolina or rice |
| <b>Unhealthy meals</b>                    | Pizza, quiche, filled tortillas or taco's, poffertjes, pancakes                                                                                                       |
| <b>Healthy meals</b>                      | Mashed potato stew with vegetables, nasi, bami, noodles                                                                                                               |
| <b>Tomato sauce (for pasta)</b>           | Tomato sauce in pasta dishes                                                                                                                                          |
| <b>Refined grain products</b>             | White rice, macaroni, spaghetti or other pasta                                                                                                                        |
| <b>Whole grain products warm meal</b>     | Whole grain rice, macaroni, spaghetti or other pasta                                                                                                                  |
| <b>Fried potato products</b>              | Rösti, fried potato or French fries                                                                                                                                   |
| <b>Boiled potatoes</b>                    | Boiled or mashed potatoes                                                                                                                                             |
| <b>Sauces</b>                             | Gravy, mayonaise or salad cream                                                                                                                                       |
| <b>Pulses</b>                             | Brown, white beans and marrowfat peas etc.                                                                                                                            |
| <b>Fish</b>                               | All types of fish                                                                                                                                                     |
| <b>Eggs</b>                               | Boiled and baked eggs                                                                                                                                                 |
| <b>Low-fat meat</b>                       | Chicken breast or leg, chop, pork slices/steak/filet, stewing beef or steak, steak tartar, roast beef,                                                                |
| <b>High-fat meat</b>                      | Chicken burger/nuggets, minced meat, bacon, sausage, hamburger, schnitzel, frankfurters or cocktail sausages as a snack or on bread                                   |
| <b>Meat alternatives and soy products</b> | Flavoured or natural soy milk(dessert). Vegetarian schnitzel/burger, tahoe/tofu, tempé, <i>Quorn</i> or <i>Valess</i> .                                               |
| <b>Granola bars</b>                       | Granola bars, Sultana, Liga nutritional biscuits                                                                                                                      |
| <b>Biscuits and pastries</b>              | Sweet pie, pastries, fruit flan, cakes and biscuits                                                                                                                   |
| <b>Ice cream</b>                          | Ice cream                                                                                                                                                             |
| <b>Chocolate and candy</b>                | All types of chocolate bars, chewing gum and sweets                                                                                                                   |

|                                     |                                                                                         |
|-------------------------------------|-----------------------------------------------------------------------------------------|
| <b>Healthy snacks</b>               | Ginger cake, sponge cake, raisins, ice lolly, breadsticks or rice cakes                 |
| <b>Savory snacks</b>                | Kroket, frikandel, satay, crisps, nibbits, prawn crackers, salty biscuits, sausage roll |
| <b>Nuts</b>                         | (coated) peanuts                                                                        |
| <b>Sugar sweetened sodas</b>        | Sugar containing soft drinks and squashes                                               |
| <b>Artificially sweetened sodas</b> | Light and artificially sweetened soft drinks and squashes                               |
| <b>Fruit drink</b>                  | Apple juice, orange juice, Dubbeldrank and multi-fruit drink                            |
| <b>Fruit drink concentrate</b>      | Fruit concentrate diksap, Roosvicee and Karvan Cevitam                                  |
| <b>Water and tea</b>                | (Mineral)water and tea without sugar                                                    |
| <b>Sugar</b>                        | Added sugar or calorie containing sweeteners in cereals, desserts or tea                |

---
